# Supplementary material
Source: PubMed Central journal article supplement (PMC3718496)
Supplement: NIHMS482139-supplement-2.pdf [file NIHMS482139-supplement-2.pdf]

**Supplementary Table 1 | Binding constants derived from ensemble fluorescence measurements**

|                                                                                                                            | E1A-TAZ2 ( $K_1$ / nM) <sup>a</sup> |                      | E1A-pRb ( $K_2$ / nM) <sup>a</sup> |                       |
|----------------------------------------------------------------------------------------------------------------------------|-------------------------------------|----------------------|------------------------------------|-----------------------|
|                                                                                                                            | Direct Titration                    | Competition          | Direct Titration                   | Competition           |
| E1A <sub>N</sub> (1-36; 36C)<br>          | 50 ± 5                              | 45 ± 20 <sup>1</sup> | > 1000                             | <i>n.d.</i>           |
| E1A <sub>CR2</sub> (106-139; 137C)<br>    | 1040 ± 200 <sup>b</sup>             | <i>n.d.</i>          | 110 ± 30                           | 90 ± 30 <sup>3</sup>  |
| E1A <sub>CR1</sub> (27-105; 88C)<br>      | < 25                                | <i>n.d.</i>          | 390 ± 50                           | 280 ± 20 <sup>4</sup> |
| E1A <sub>N-CR1</sub> (1-105; 88C)<br>     | < 25                                | <i>n.d.</i>          | 450 ± 70 <sup>b</sup>              | <i>n.d.</i>           |
| E1A <sub>CR1-CR2</sub> (27-139; 88C)<br>  | < 25                                | 5 ± 1 <sup>2</sup>   | < 25                               | 12 ± 3 <sup>5</sup>   |
| E1A <sub>N-CR1-CR2</sub> (1-139; 88C)<br> | < 25                                | <i>n.r.</i>          | < 25                               | <i>n.r.</i>           |

<sup>a</sup> Unless stated otherwise, the reported binding constants are the average of two independent experiments, and the reported errors are standard deviations (see Supplementary Figure 2).

<sup>b</sup> Derived from single measurement; errors obtained from nonlinear least-squares (NLS) fitting

*n.d.* Not determined

*n.r.* Not reliable due to protein aggregation

<sup>1-5</sup> Derived assuming dissociation constant ( $K_d$ ) values of 50, 13, 112, 385 and 25 nM, respectively, for the direct titration measurements

## Supplementary Table 2 | Binding constants derived from single-molecule FRET experiments

|                                                                                                                                | <b>E1A-pRb</b>             | <b>E1A-TAZ2</b>            | <b>pRb-E1A-TAZ2</b> ( $K_1$ / nM) <sup>a</sup> |                 |                   |
|--------------------------------------------------------------------------------------------------------------------------------|----------------------------|----------------------------|------------------------------------------------|-----------------|-------------------|
|                                                                                                                                | ( $K_2$ / nM) <sup>a</sup> | ( $K_1$ / nM) <sup>a</sup> | + 0.25 $\mu$ M pRb                             | + 1 $\mu$ M pRb | + 1.5 $\mu$ M pRb |
| E1A <sub>CR1</sub> (27-105; 36C88C)<br>       | 390 $\pm$ 50 <sup>b</sup>  | 11.7 $\pm$ 0.4             | <i>n.d.</i>                                    | 34 $\pm$ 6      | 40 $\pm$ 4        |
| E1A <sub>N-CR1</sub> (1-105; 36C88C)<br>      | 450 $\pm$ 70 <sup>b</sup>  | 3.2 $\pm$ 0.5              | 4.5 $\pm$ 1.2                                  | 1.5 $\pm$ 0.3   | <i>n.d.</i>       |
| E1A <sub>CR1-CR2</sub> (27-139; 36C88C)<br>   | 4.1 $\pm$ 0.4              | 7.5 $\pm$ 1.0              | 11.3 $\pm$ 4.4                                 | 18 $\pm$ 6      | <i>n.d.</i>       |
| E1A <sub>N-CR1-CR2</sub> (1-139; 36C88C)<br>  | 4.5 $\pm$ 0.4              | 1.6 $\pm$ 0.3              | 4.0 $\pm$ 1.3                                  | <i>n.d.</i>     | <i>n.d.</i>       |
| E1A <sub>CR1-CR2</sub> (27-139; -3C111C)<br>  | 13.0 $\pm$ 2.6             | 18.2 $\pm$ 2.5             | 37 $\pm$ 31                                    | <i>n.d.</i>     | <i>n.d.</i>       |
| E1A <sub>N-CR1-CR2</sub> (1-139; -3C111C)<br> | 10 $\pm$ 2                 | 10.2 $\pm$ 1.1             | 6.3 $\pm$ 1.5                                  | <i>n.d.</i>     | <i>n.d.</i>       |
| E1A <sub>CR1-CR2</sub> (27-139; 36C137C)<br>  | 8.2 $\pm$ 0.7              | 2.6 $\pm$ 0.5              | <i>n.d.</i> <sup>c</sup>                       | <i>n.d.</i>     | <i>n.d.</i>       |
| E1A <sub>N-CR1-CR2</sub> (1-139; 36C137C)<br> | 13.6 $\pm$ 0.5             | 2.3 $\pm$ 0.5              | <i>n.d.</i> <sup>c</sup>                       | <i>n.d.</i>     | <i>n.d.</i>       |

<sup>a</sup> Unless stated otherwise,  $K_d$  errors are average fitting errors between the NLS fits of the free and bound species titration data (see Supplementary Figures 3-6 and Methods).

<sup>b</sup> Derived from ensemble anisotropy measurements (Supplementary Table 1)

<sup>c</sup> Could not be determined due to very similar  $E_{\text{FRET}}$  signals for the E1A-pRb, E1A-TAZ2 and E1A-TAZ2-pRb complexes (Supplementary Table 3)

*n.d.* Not determined because lower pRb concentrations are sufficient for saturation

Supplementary Table 3 |  $E_{\text{FRET}}$  characteristics of different E1A dual-labeled constructs

|                                                                                                                                  | FRET Efficiencies* |             |             |              |
|----------------------------------------------------------------------------------------------------------------------------------|--------------------|-------------|-------------|--------------|
|                                                                                                                                  | E1A                | E1A-pRb     | E1A-TAZ2    | pRb-E1A-TAZ2 |
| E1A <sub>CR1</sub> (27-105; 36C88C)<br>         | 0.46 ± 0.02        | 0.43 ± 0.01 | 0.90 ± 0.01 | 0.87 ± 0.04  |
| E1A <sub>N-CR1</sub> (1-105; 36C88C)<br>        | 0.45 ± 0.01        | 0.45 ± 0.01 | 0.83 ± 0.01 | 0.82 ± 0.01  |
| E1A <sub>CR1-CR2</sub> (27-139; 36C88C)<br>     | 0.47 ± 0.01        | 0.67 ± 0.01 | 0.87 ± 0.02 | 0.91 ± 0.01  |
| E1A <sub>N-CR1-CR2</sub> (1-139; 36C88C)<br>    | 0.44 ± 0.01        | 0.66 ± 0.01 | 0.83 ± 0.01 | 0.87 ± 0.01  |
| E1A <sub>CR1-CR2</sub> (27-139; -3C111C)<br>    | 0.29 ± 0.01        | 0.67 ± 0.01 | 0.76 ± 0.01 | 0.76 ± 0.01  |
| E1A <sub>N-CR1-CR2</sub> (1-139; -3C111C)<br>   | 0.23 ± 0.01        | 0.41 ± 0.01 | 0.73 ± 0.01 | 0.73 ± 0.03  |
| E1A <sub>CR1-CR2</sub> (27-139; 36C137C)<br>   | 0.24 ± 0.01        | 0.82 ± 0.01 | 0.86 ± 0.01 | 0.80 ± 0.01  |
| E1A <sub>N-CR1-CR2</sub> (1-139; 36C137C)<br> | 0.23 ± 0.01        | 0.80 ± 0.01 | 0.81 ± 0.01 | <i>n.d.</i>  |

*n.d.* Could not be determined

\* Errors reported are the standard deviation of multiple measurements

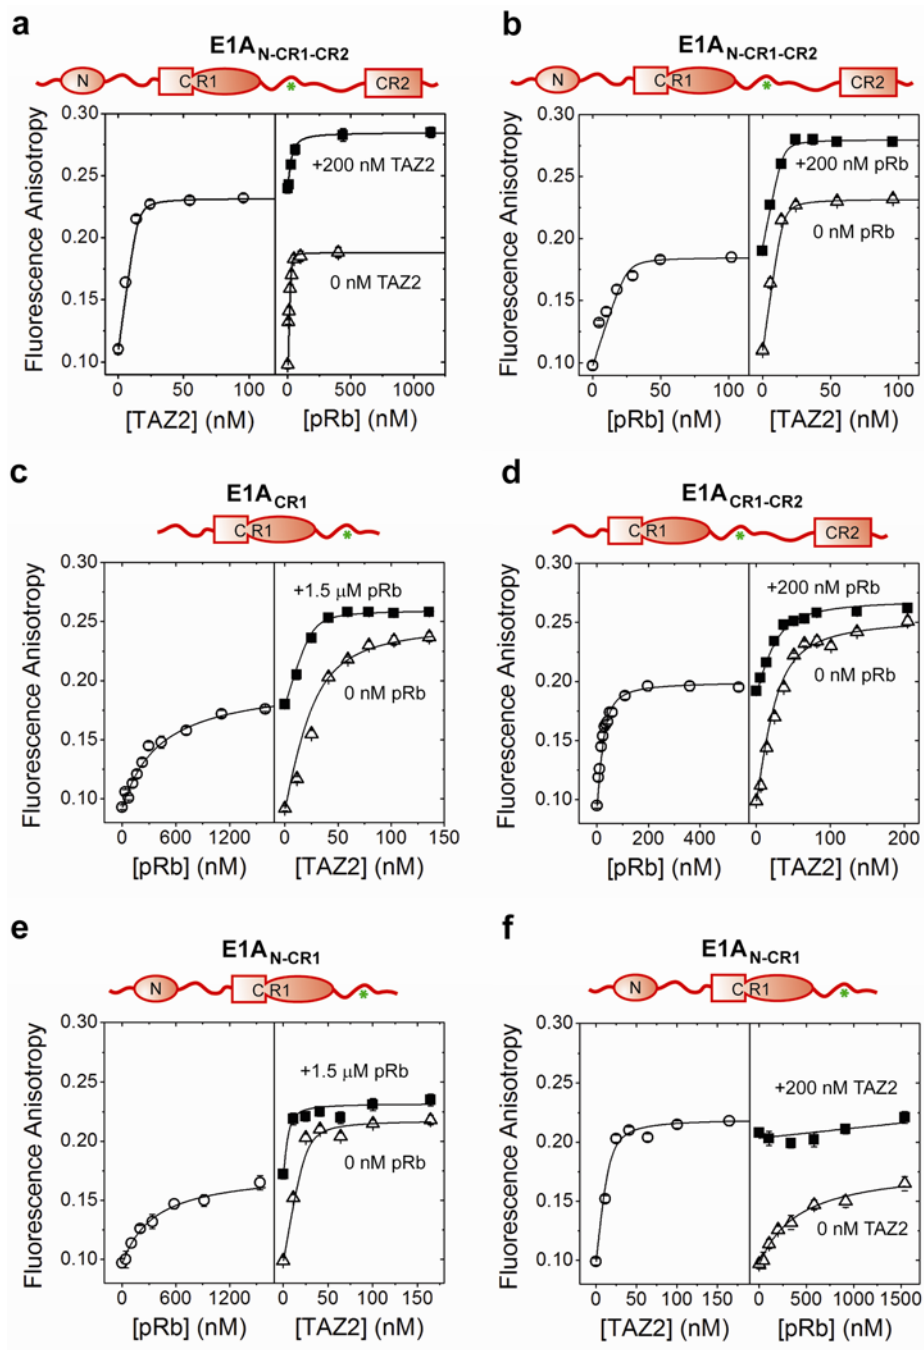

**Supplementary Figure 1 | E1A-TAZ2-pRb ternary complex formation monitored using ensemble fluorescence anisotropy.** Presented in **a-f** are titration data on the TAZ2/pRb binding of free (open symbols) and TAZ2- or pRb-bound (solid symbols) Alexa Fluor 594-labeled E1A. The specific E1A (S88C) constructs used are indicated. See Fig. 1b and Methods for more details.

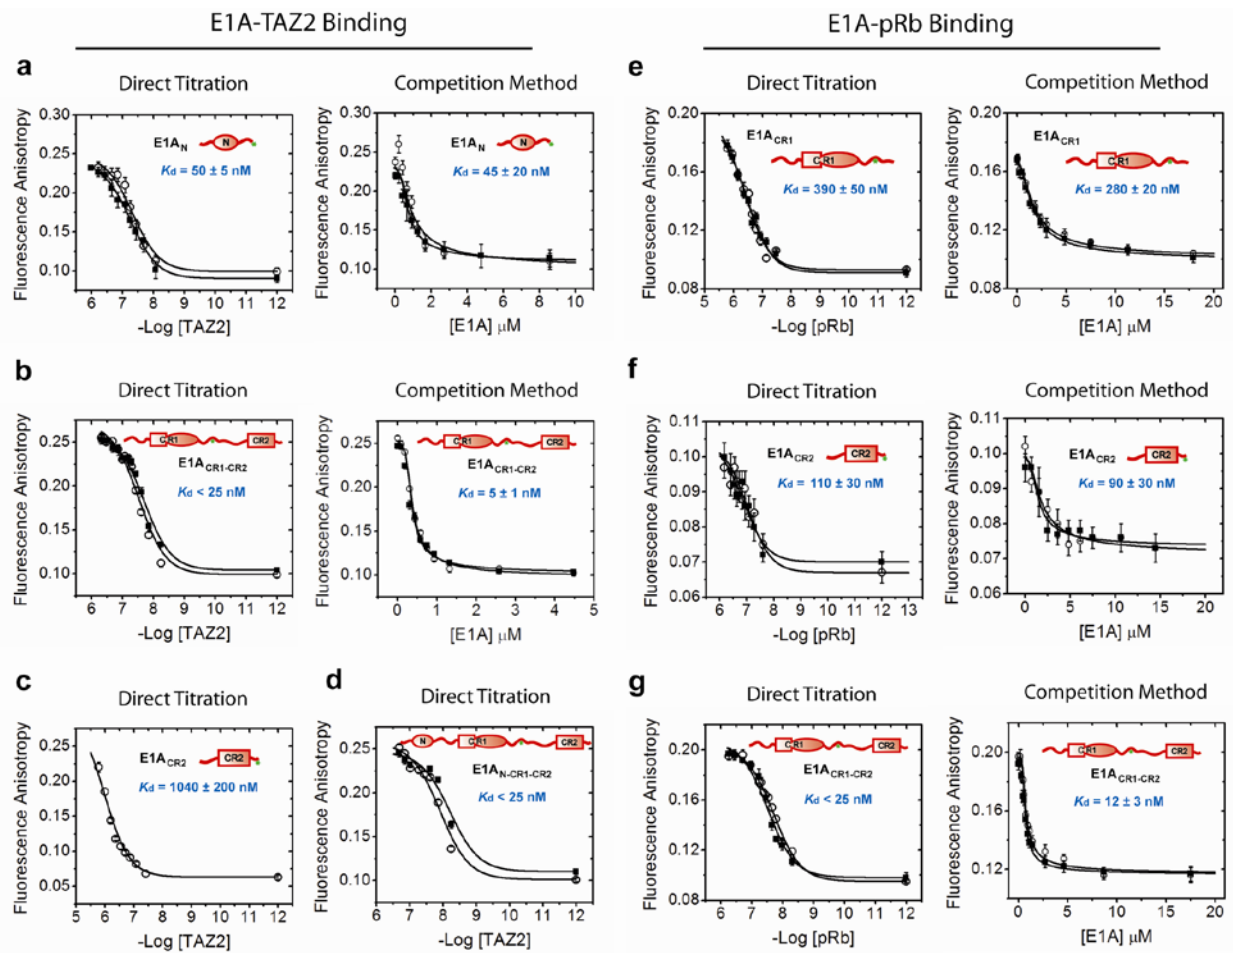

**Supplementary Figure 2 | Determination of dissociation constants using ensemble fluorescence anisotropy.** Shown are representative titration data on the TAZ2 (a-d) and pRb (e-g) binding of different Alexa Fluor 594-labeled E1A constructs using direct and competition methods. The specific E1A constructs used are indicated. See Fig. 1b and Methods for more details.

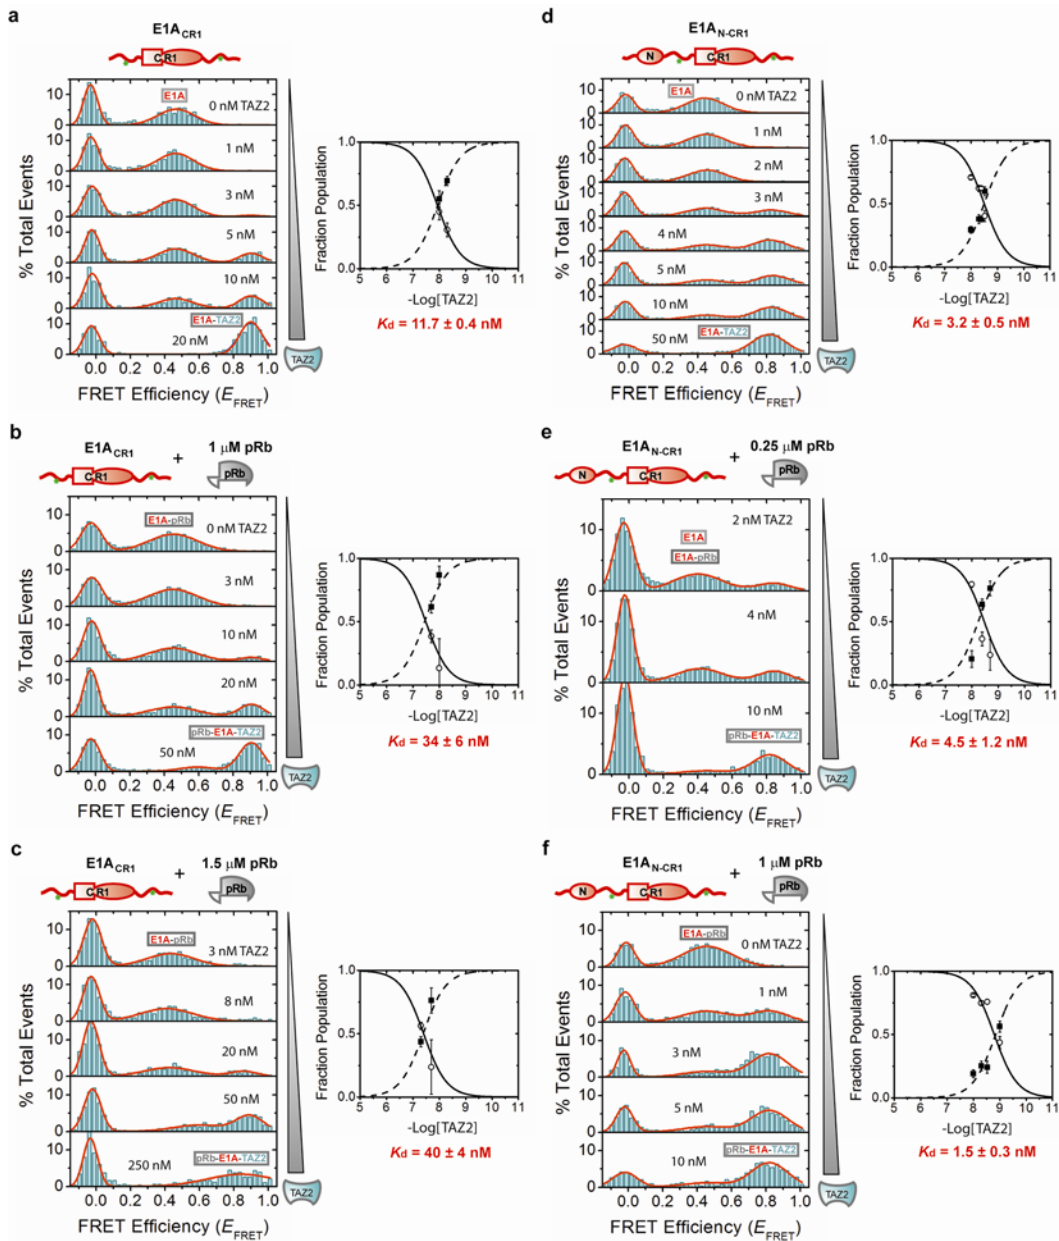

**Supplementary Figure 3 | Determination of dissociation constants using smFRET: Allosteric interaction between the E1A N-terminal and CR1 regions.** Shown are representative smFRET titration data of E1A<sub>CR1</sub>(27-105; 36C88C) and E1A<sub>N-CR1</sub>(1-105; 36C88C) with CBP TAZ2 in the absence (**a,d**) and presence of pRb (**b-c, e-f**). The concentration of pRb in the solution and the specific E1A FRET constructs used are indicated. Also shown for each set of titration data are the NLS best-fit curves to a one-to-one binding model for the ligand concentration dependence of the measured fractional populations (*i.e.*, fraction bound [open symbols] and unbound [filled symbols]), and the derived average  $K_d$  values and fitting errors. See Fig. 1b and Methods for more details.

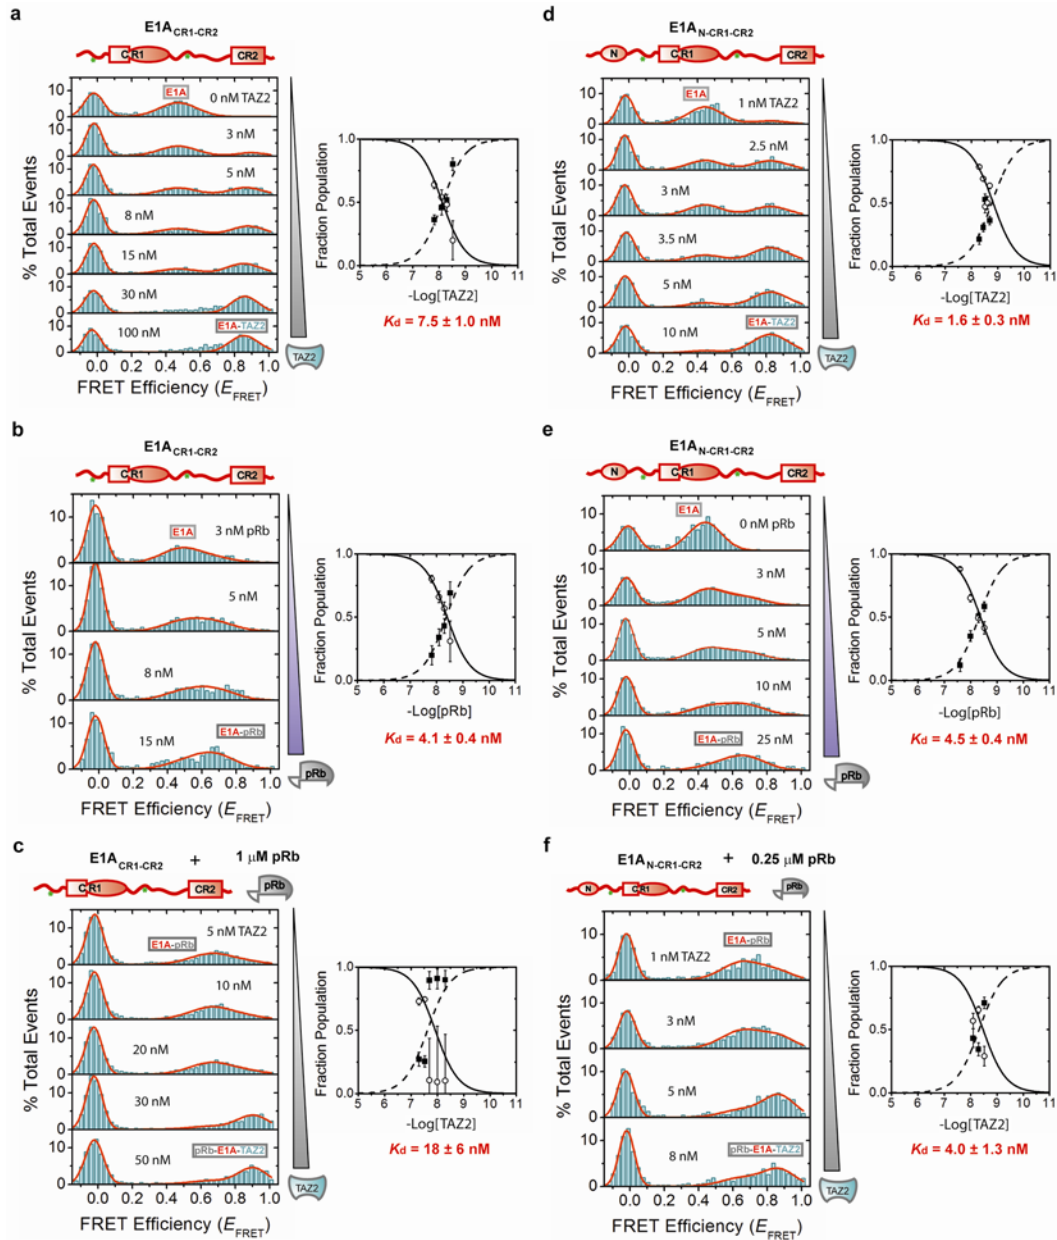

**Supplementary Figure 4 | Determination of dissociation constants using smFRET: Allosteric interaction between the E1A N-terminal and CR1-CR2 regions (I).** Shown are representative smFRET titration data of E1A<sub>CR1-CR2</sub>(27-139; 36C88C) and E1A<sub>N-CR1-CR2</sub>(1-139; 36C88C) with CBP TAZ2 (**a**, **c-d**, **f**) or pRb (**b**, **e**) in the absence (**a-b**, **d-e**) and presence of pRb (**c**, **f**) before titration. The pre-titration concentration of pRb (for **c** and **f**) and the specific E1A FRET constructs used are indicated. Also shown for each set of titration data are the NLS best-fit curves to a one-to-one binding model for the ligand concentration dependence of the measured fractional populations, and the derived average  $K_d$  values and fitting errors. See Fig. 1b and Methods for more details.

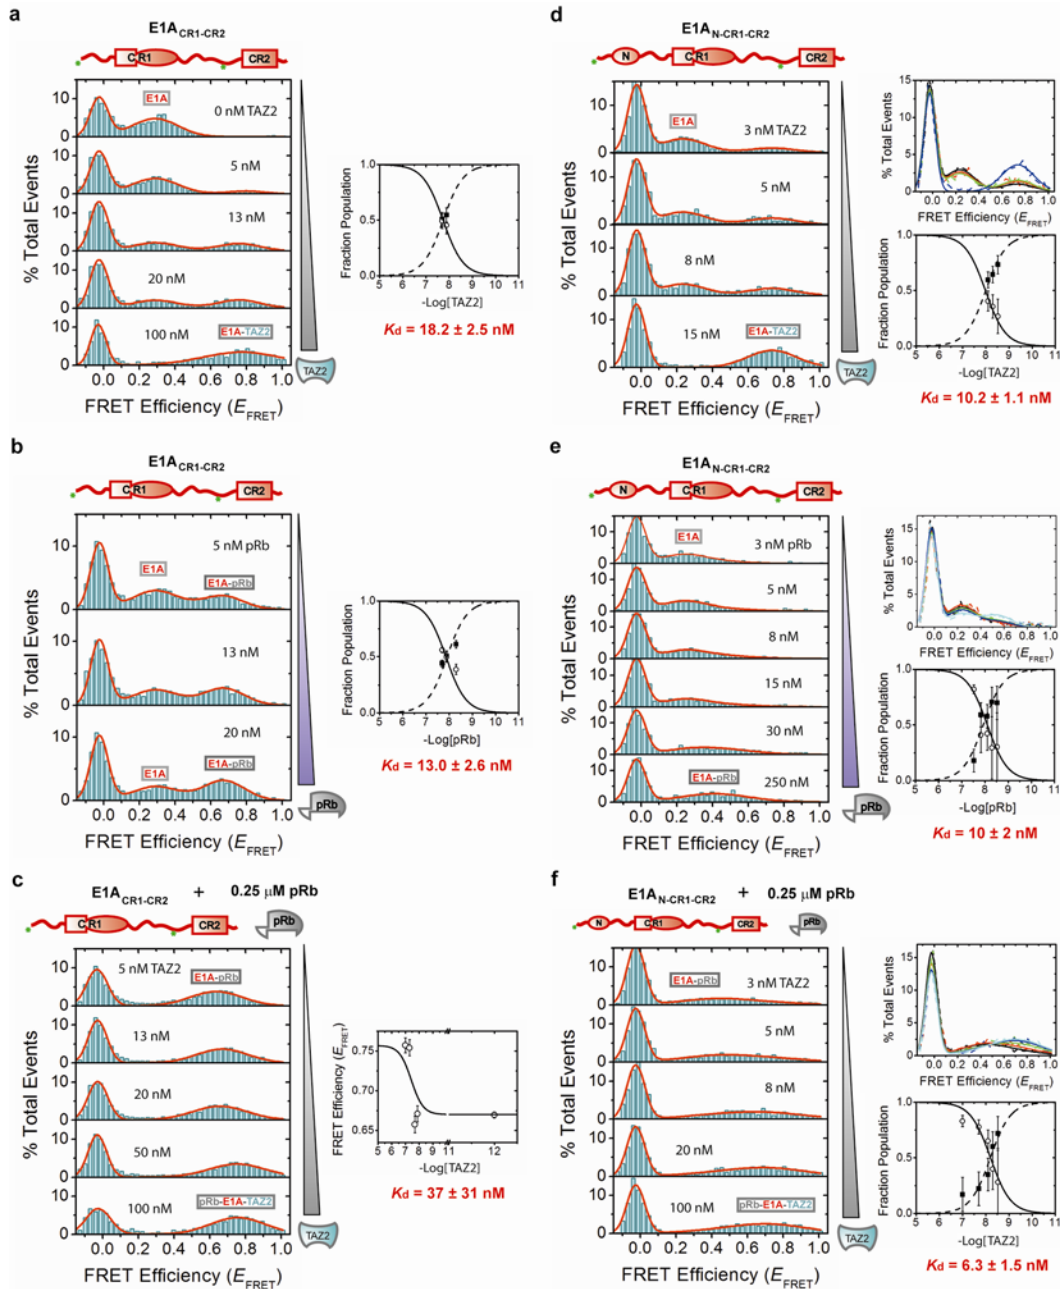

**Supplementary Figure 5 | Determination of dissociation constants using smFRET: Allosteric interaction between the E1A N-terminal and CR1-CR2 regions (II).** Shown are representative smFRET titration data of E1A<sub>CR1-CR2</sub>(27-139; -3C111C) and E1A<sub>N-CR1-CR2</sub>(1-139; -3C111C) with CBP TAZ2 (a, c-d, f) or pRb (b, e) in the absence (a-b, d-e) and presence of pRb (c, f) before titration. The pre-titration concentration of pRb (for c and f) and the specific E1A FRET constructs used are indicated. Also shown for each set of titration data are the NLS best-fit curves to a one-to-one binding model for the ligand concentration dependence of the measured fractional populations (a-b, d-f) or FRET efficiencies (c), and the derived average  $K_d$  values and fitting errors. See Fig. 1b and Methods for more details.



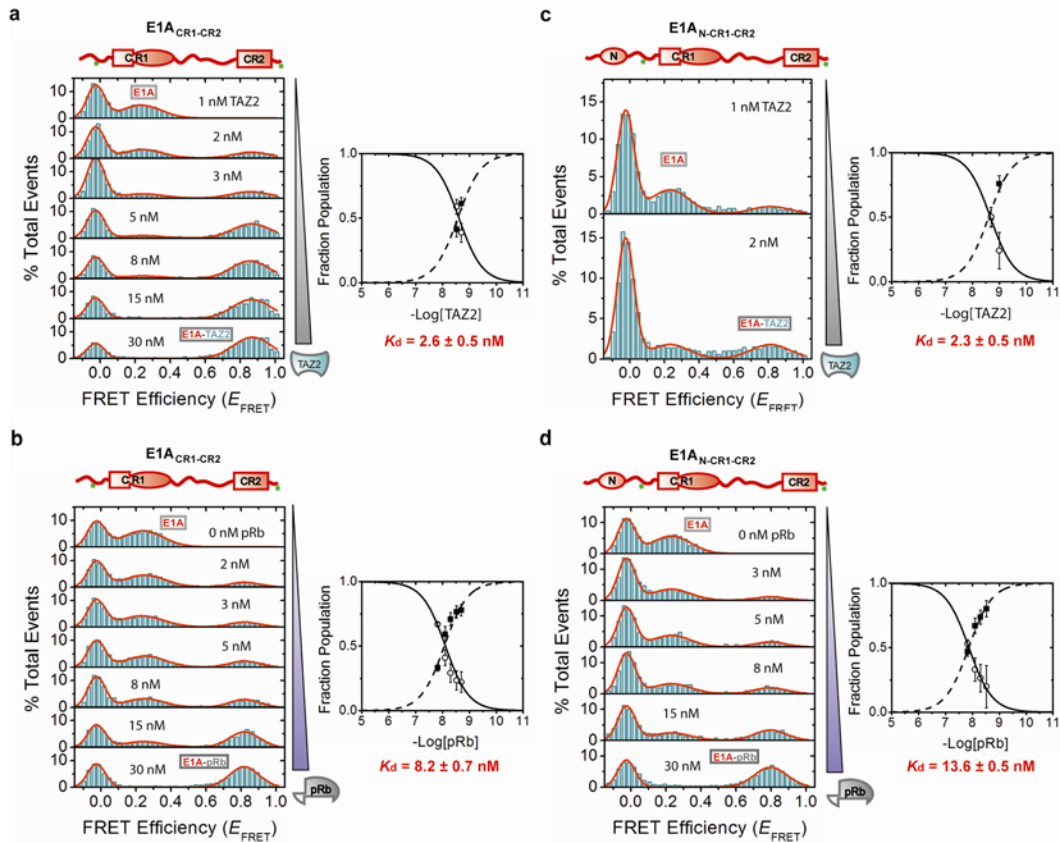

**Supplementary Figure 6 | Determination of dissociation constants using smFRET: Allosteric interaction between the E1A N-terminal and CR1-CR2 regions (III).** Shown are representative smFRET titration data of E1A<sub>CR1-CR2</sub>(27-139; 36C137C) and E1A<sub>N-CR1-CR2</sub>(1-139; 36C137C) with CBP TAZ2 (a, c) or pRb (b, d). The specific E1A FRET constructs used are indicated. Also shown for each set of titration data are the NLS best-fit curves to a one-to-one binding model for the ligand concentration dependence of the measured fractional populations, and the derived average  $K_d$  values and fitting errors. See Fig. 1b and Methods for more details.

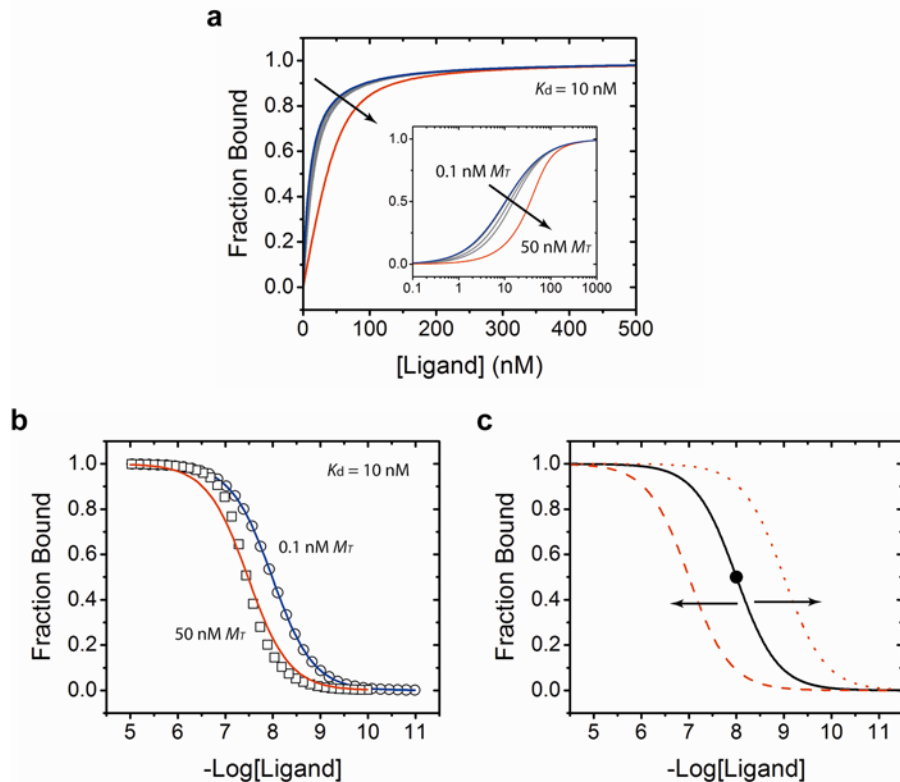

**Supplementary Figure 7 | Ligand binding simulations.** (a) The effect of the macromolecule concentration on ligand binding measurements. Data simulations were carried out using Eq. 3 (Methods), using fraction bound as observable, and assuming a  $K_d$  of 10 nM and macromolecule concentrations ( $M_T$ ) of 0.1, 1, 5, 10 and 50 nM.  $M_T/K_d$  ratios of 1 or less result in binding curves that are practically identical. (b) Comparison of binding curves with different  $M_T/K_d$  ratios (0.01 vs. 5). The simulated data were fitted to Eq. 2 (Methods), assuming that the total ligand and free ligand concentrations are equal. This approximation is reasonably acceptable when the  $M_T/K_d$  ratio is small, as is the case with the smFRET experiments described in this paper (where  $M_T = 100 \text{ pM}$  and the measured  $K_d$  values are all within the nM range; see Supplementary Table 2). When  $M_T \gg K_d$ , the approximation becomes invalid and the application of Eq. 2, inappropriate. (c) Single-parameter model fitting. Because the binding stoichiometries are known, and given that the  $M_T/K_d$  ratios are small and the intercepts/slopes for the binding curves are constants (which is the case when using fraction populations as observable), single-parameter fits can be performed in the analyses of the smFRET binding data reported here. Thus, in principle, a single point within the binding transition is enough to determine  $K_d$  values using smFRET data, and the fitting process can be visualized and performed by horizontally “sliding” a bounded curve until it coincides with the data point.
